# Supplementary material for: Development and Characterization of Recombinase-Based Isothermal Amplification Assays (RPA/RAA) for the Rapid Detection of Monkeypox Virus
Source: MDPI journal article supplement (doi:10.3390/v14102112), 2022-09-23
Supplement: s1 [file s1]

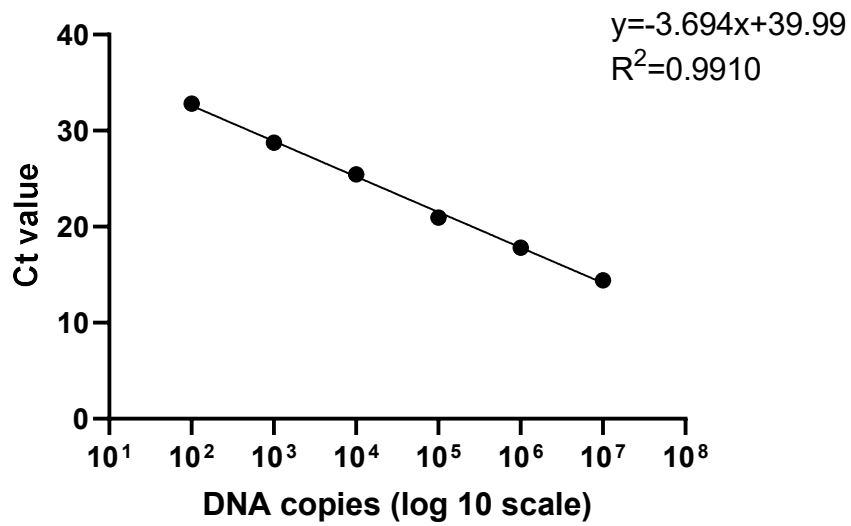

**Figure S1. The standard curve of the real-time PCR.** Serial 10-fold dilutions of MPXV DNA plasmids ( $10^7$ - $10^0$  copies) were detected by real-time PCR. The standard curve was calculated from the Ct value of  $10^7$  to  $10^2$  concentration of MPXV DNA plasmids.
